# Supplementary material for: The circadian cryptochrome, CRY1, is a pro-tumorigenic factor that rhythmically modulates DNA repair
Source: PubMed Central journal article supplement (PMC7810852; doi:10.1038/s41467-020-20513-5), 2021-01-15
Supplement: 41467_2020_20513_MOESM1_ESM.pdf [file 41467_2020_20513_MOESM1_ESM.pdf]

# Supplementary Figure 1

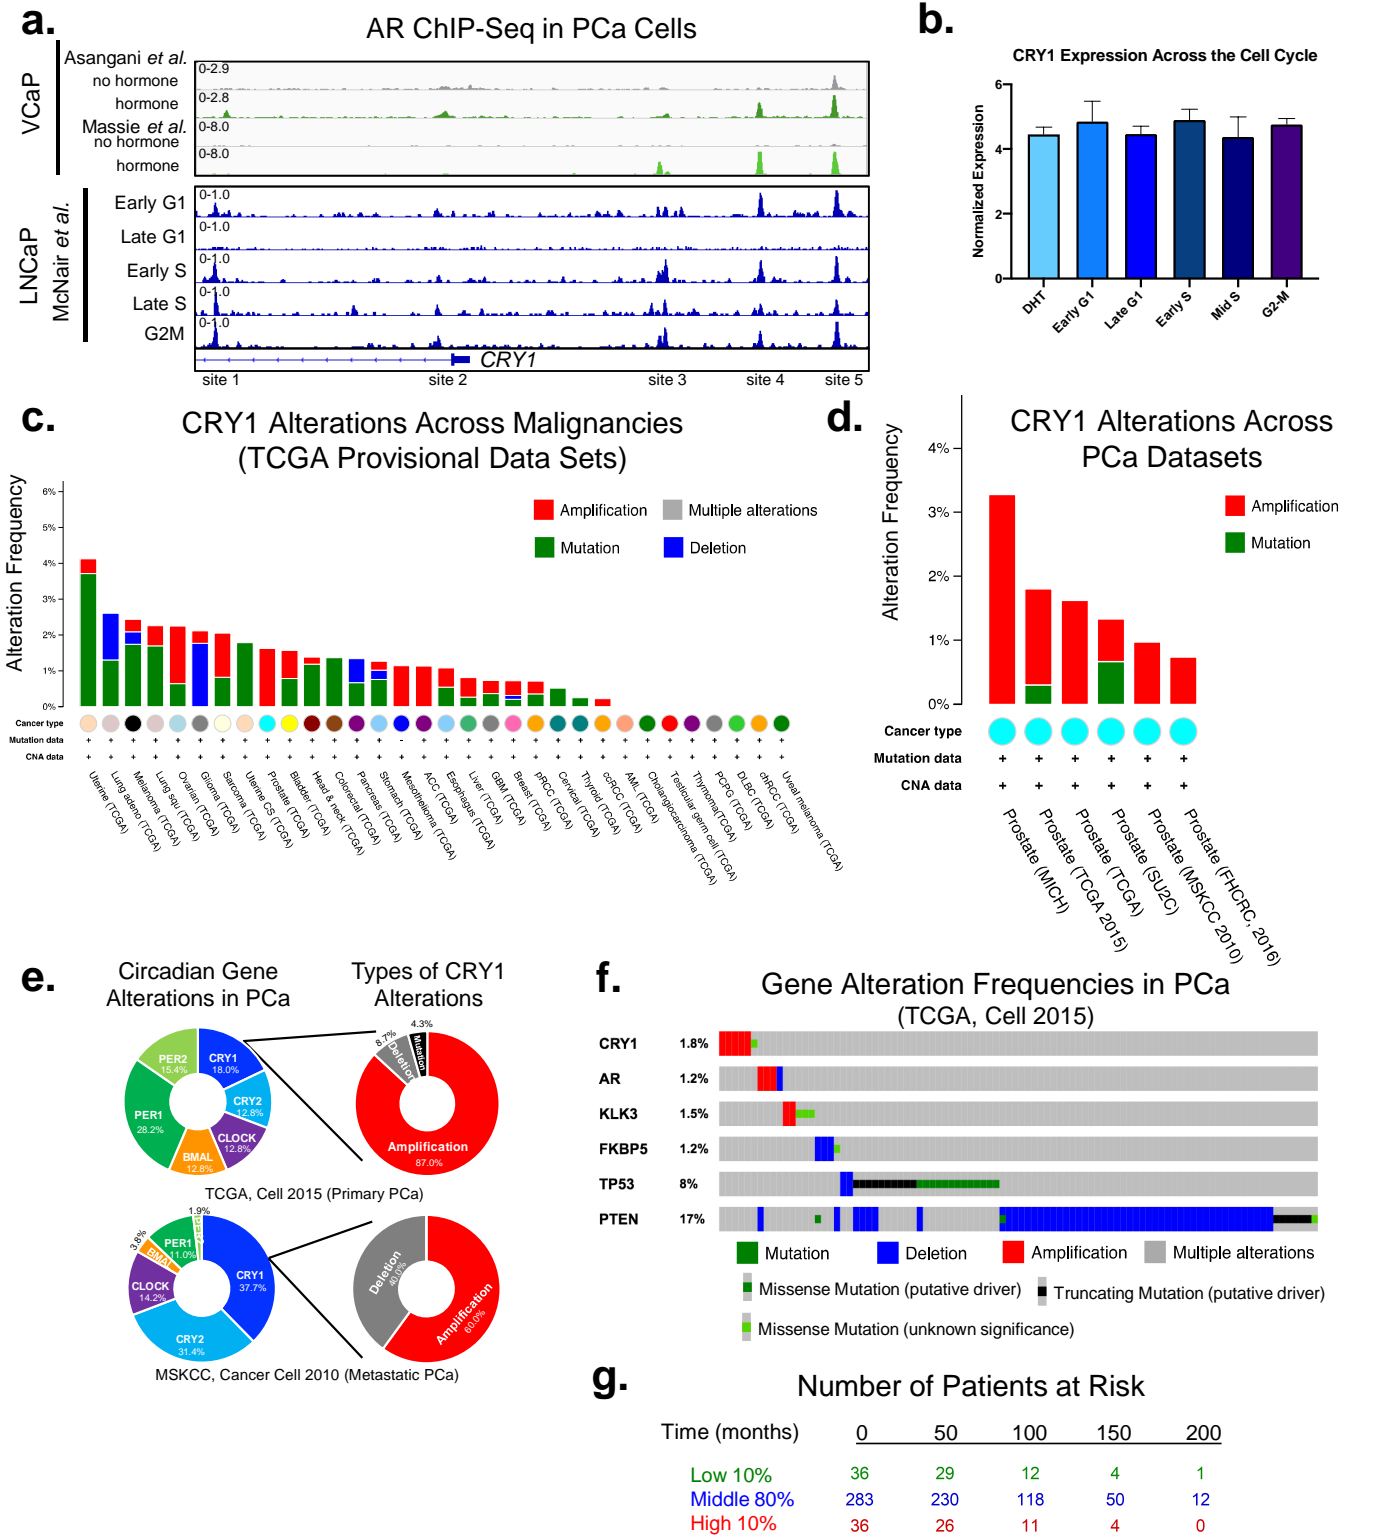

**Supplementary Figure 1. Altered CRY1 expression is associated with different types of cancer. A.** AR binding sites on CRY1 in PCa data sets of VCaP cells (Asangani *et al.* 2014 and Massie *et al.* 2011) and LNCaP cells (McNair *et al.* 2017, in early G1, late G1, early S, late S, and G2M phase). Genomic traces showing AR binding sites on CRY1. **B.** CRY1 mRNA expression across the phases of the cell cycle. **C-D.** Frequency of CRY1 alterations (i.e. amplifications, mutations, and/or deletions) in different cancer types (C) and in primary and/or metastatic PCa datasets (D) from cBioPortal. **E.** Frequency of core circadian clock gene alterations (i.e. amplifications, mutations, and/or deletions) in primary and metastatic PCa datasets from cBioPortal. **F.** Frequency of CRY1, AR, KLK3, FKBP5, TP53, and PTEN alterations in primary PCa. **G.** Number of patients at risk in each cohort (low, middle, and high) in the JHMI retrospective cohort for poor metastatic PCa outcome.

## Supplementary Figure 2

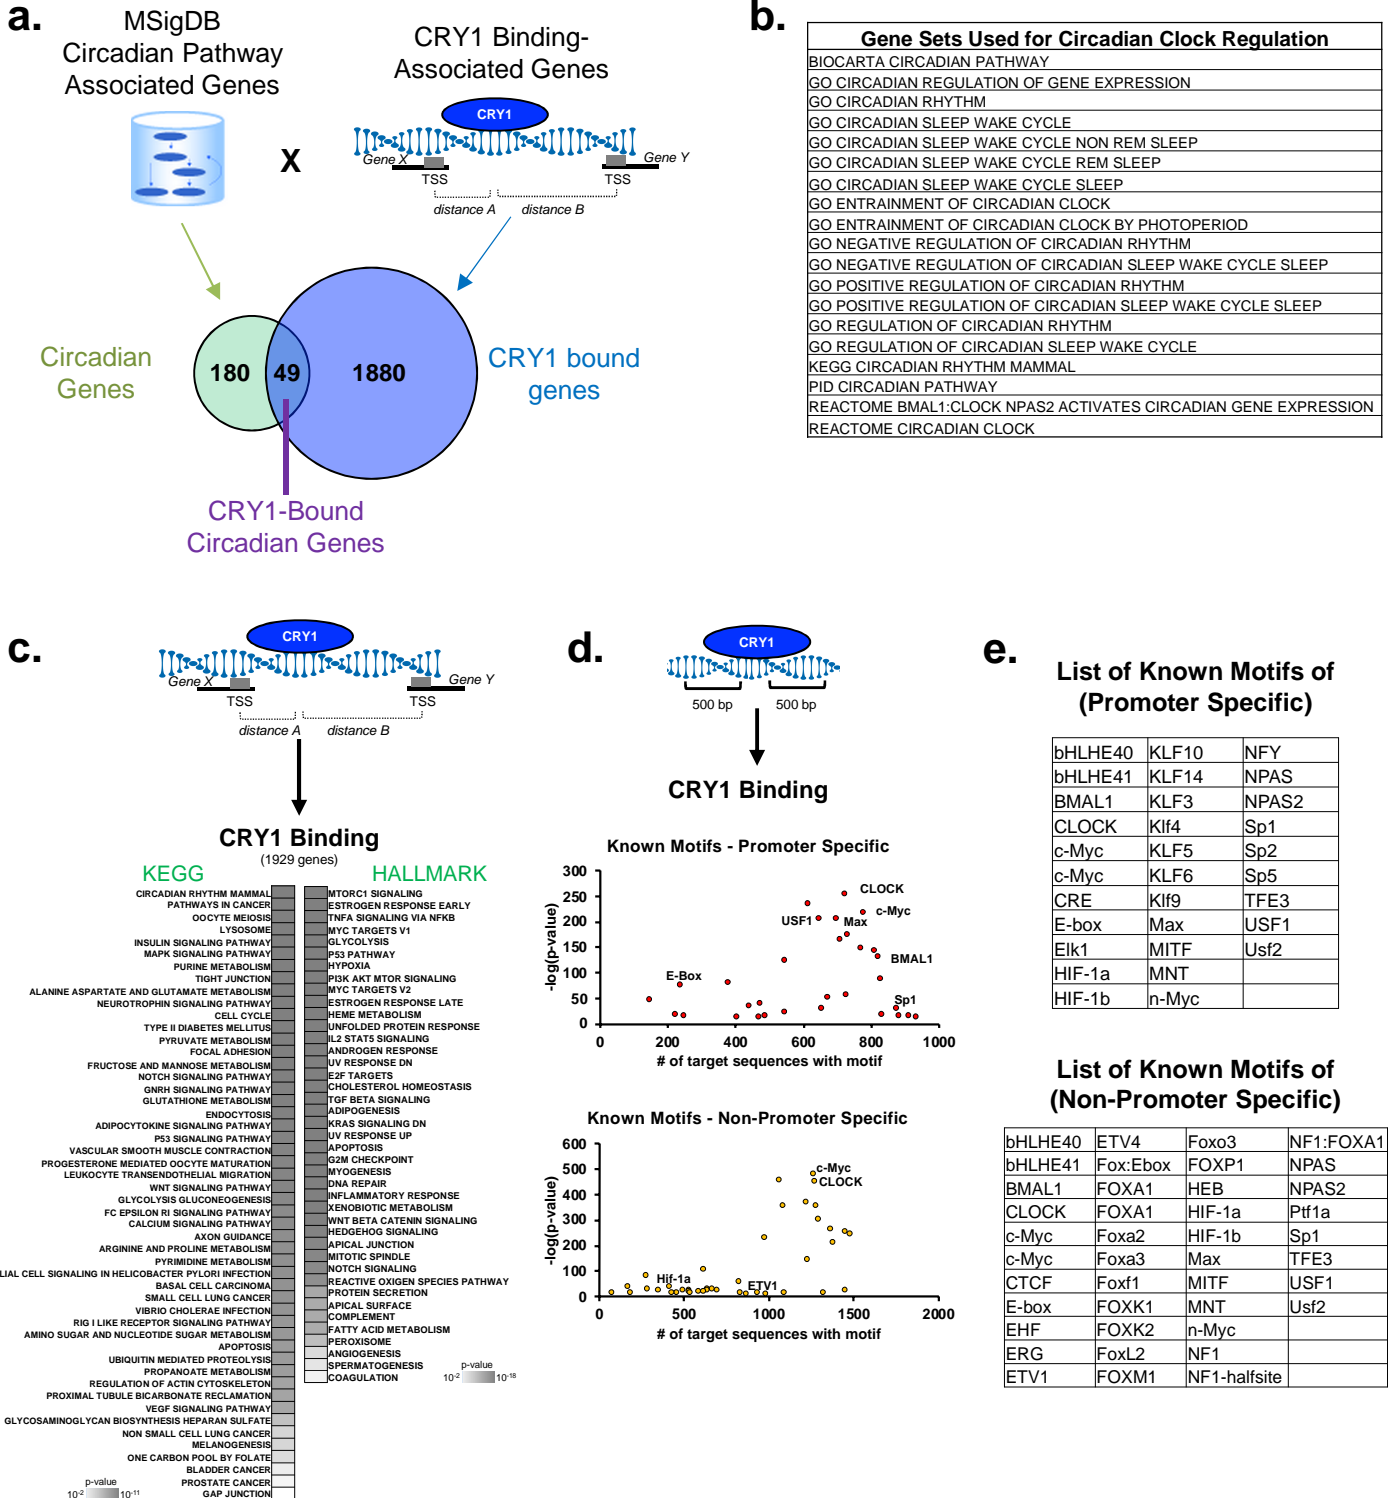

**Supplementary Figure 2. The CRY1 cistrome is enriched for cancer-associated pathways. A.** Schematic describing the comparison of ChIP-Seq data with known circadian factors. Briefly, the CRY1-bound circadian genes were identified by comparing all the circadian genes (curated from the MSigDB of circadian pathways) to the genes with a CRY1 binding site within a TSS (transcriptional start site) of binding. **B.** List of all the MSigDB Gene Sets used for curating the list of circadian genes used in the comparison. **C.** KEGG and Hallmark Pathway analysis of genes bound by CRY1 within a transcriptional start site (TSS) of a gene with CRY1 binding with an FDR<0.25. **D.** Known motif enrichments for promoter specific and non-promoter specific motifs of CRY1 binding in vehicle treated C4-2 cells within 500 bp binding window on each side of the center of binding. **E.** List of known motifs factors for promoter specific and non-promoter specific regions.

## Supplementary Figure 3

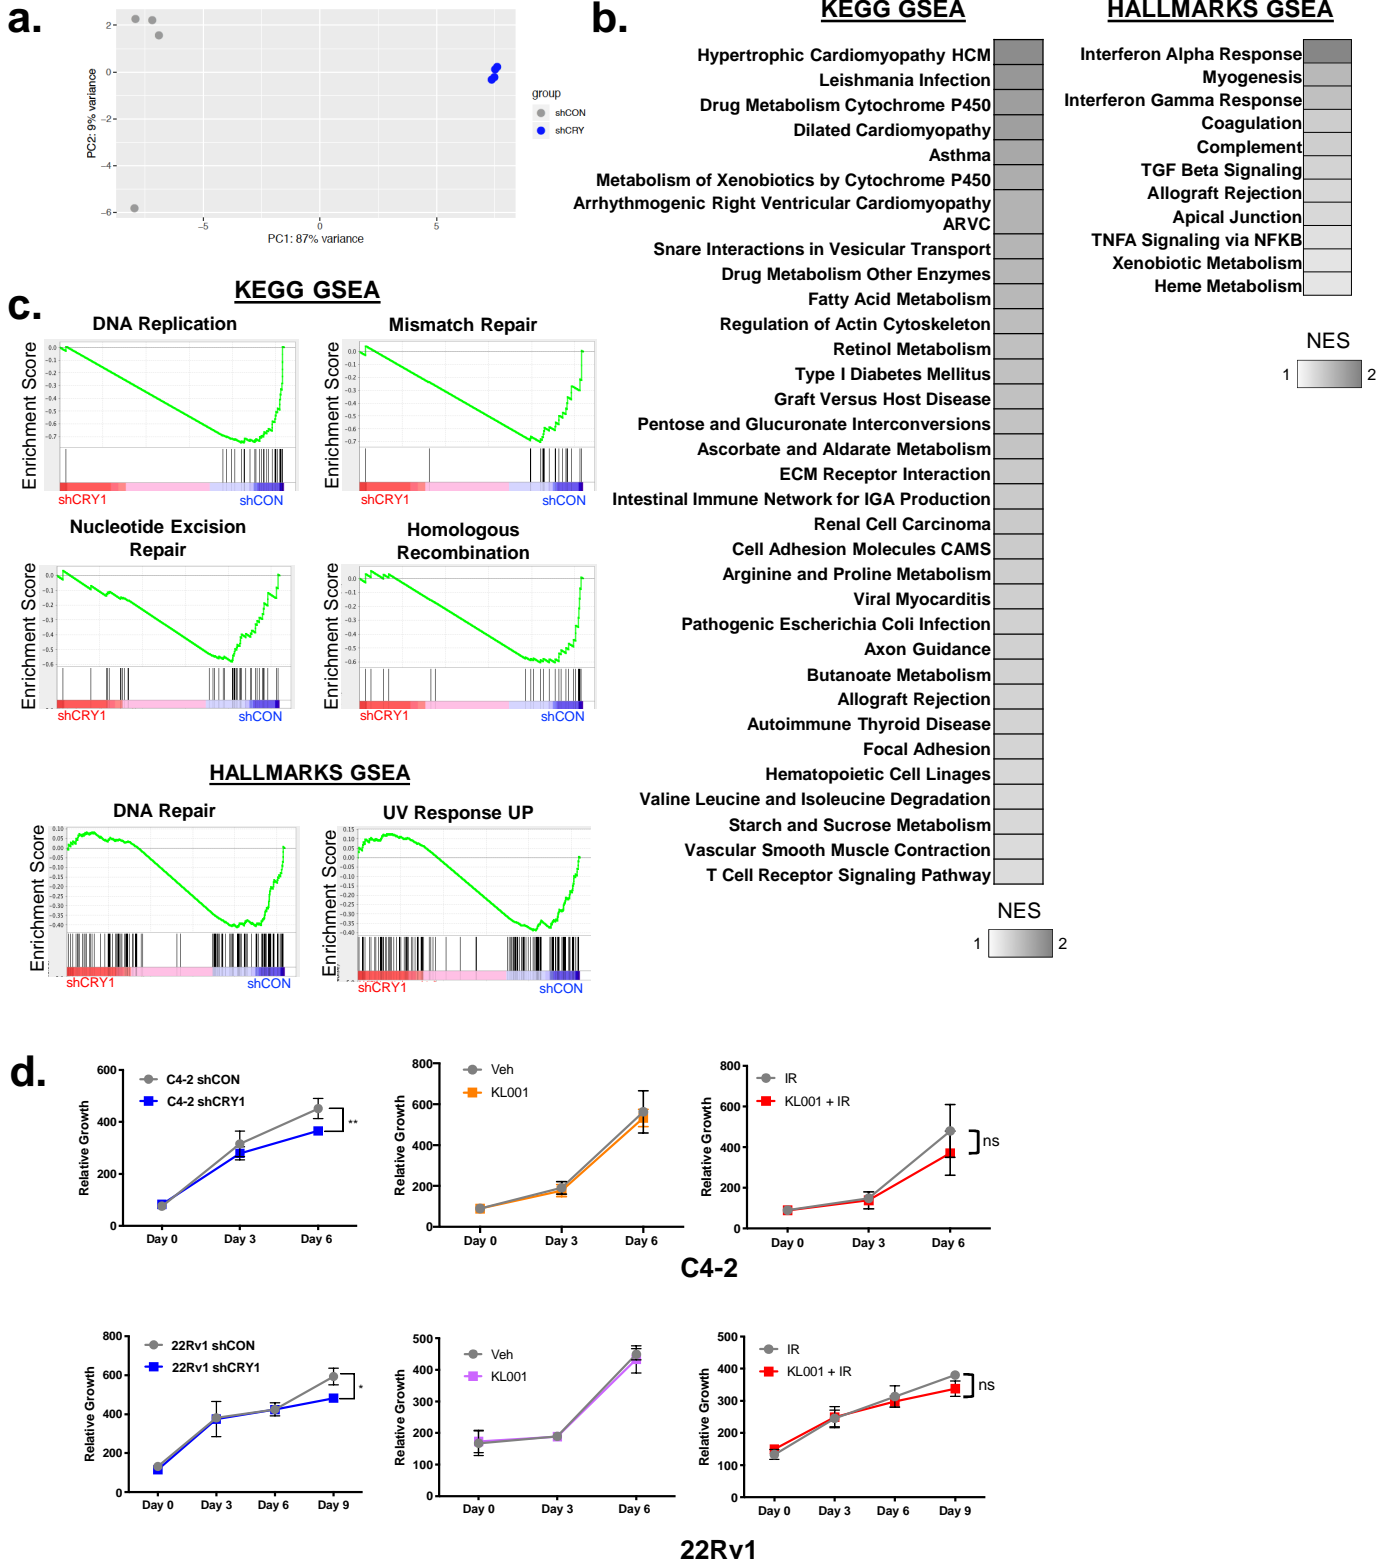

**Supplementary Figure 3. Genome-wide assessment of CRY1 transcriptome identifies several DNA repair processes.** **A.** Principal component analysis (PCA) plots of the RNA-Seq samples run. **B.** GSEA of RNA-Seq (KEGG and HALLMARKS Pathway Analysis from MSigDB) was used to identify enriched and deenriched pathways for CRY1-regulated pathways using FDR<0.25. **C.** Leading-edge plots of the DNA repair pathways identified from the GSEA of the RNA-Seq data (KEGG and Hallmarks Pathway Analysis). **D.** CRY1 expression was knocked down in C4-2-shCRY1 and 22Rv1-shCRY1 cells (in hormone-proficient media) for indicated days. C4-2 and 22Rv1 cells were treated with 10  $\mu$ M KL001 at Day 0 and harvested at days 0, 3, and 6 for C4-2 and 0, 3, and 6 for 22Rv1 to assess relative growth. Cells were counted for each time point and graphed as relative growth. N=3 independent experiments. Data are presented as mean values  $\pm$  SEM and analyzed using one-way Anova (\*p<0.05, \*\*p<0.01, \*\*\*p<0.001, &, \*\*\*\*p<0.0001). Statistical significance was evaluated at 0.05 alpha level with GraphPadPrism, version 8.3.1, Mac. Source data are provided in the Source Data file.

## Supplementary Figure 4

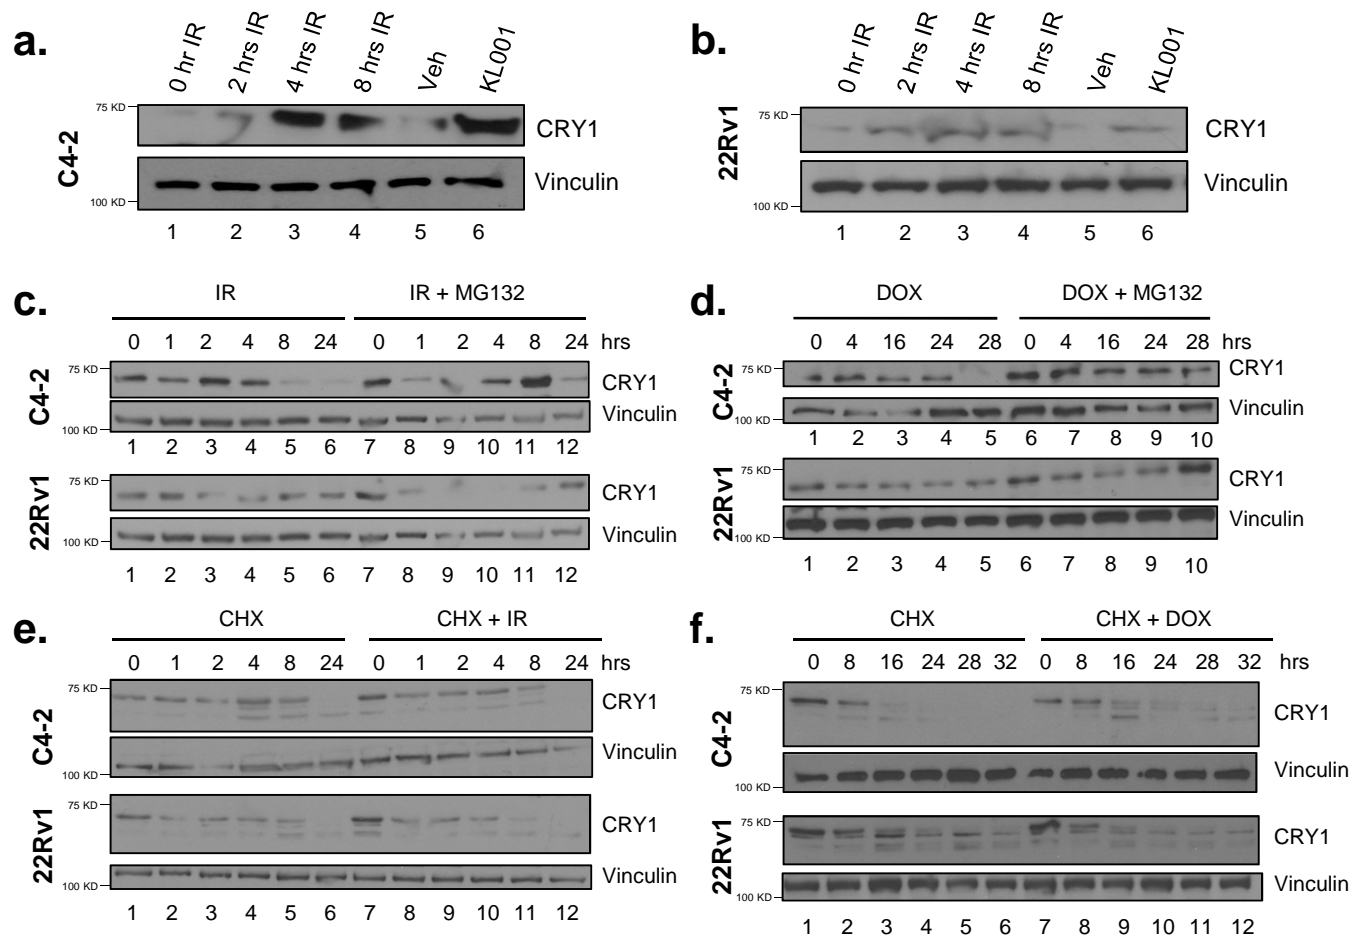

**Supplementary Figure 4. DNA damage stabilizes CRY1 protein expression. A-B.** C4-2 and 22Rv1 cells were treated 5 Gy IR for 0-8 hours and with 10  $\mu$ M KL001 for 6 and 24 hours, respectively. **C.** C4-2 and 22Rv1 cells were treated 1  $\mu$ M MG132 and 2 or 5 Gy IR for 1, 2, 4, 8, and 24 hrs. **D.** C4-2 and 22Rv1 cells were treated 1  $\mu$ M MG132 and 10 nM DOX for 8, 16, 24, 28, and 32 hrs. **E.** C4-2 and 22Rv1 cells were treated 10  $\mu$ g/mL CHX and 2 or 5 Gy IR for 1, 2, 4, 8, and 24 hrs. **F.** C4-2 and 22Rv1 cells were treated 10  $\mu$ g/mL CHX and 10 nM DOX for 8, 16, 24, 28, and 32 hrs. **A-F.** Cells were harvested and protein expression of CRY1 and Vinculin was analyzed. N=3 independent experiments.



## Supplementary Figure 5

a.

| Gene Sets Used for Each Type of DDR                                                      |
|------------------------------------------------------------------------------------------|
| <b>Homologous Recombination (HR)</b>                                                     |
| GO REGULATION OF DOUBLE STRAND BREAK REPAIR VIA HOMOLOGOUS RECOMBINATION                 |
| KEGG HOMOLOGOUS RECOMBINATION                                                            |
| REACTOME HOMOLOGOUS RECOMBINATION REPAIR OF REPLICATION INDEPENDENT DOUBLE STRAND BREAKS |
| <b>Mismatch Repair (MMR)</b>                                                             |
| GO MISMATCH REPAIR                                                                       |
| GO MISMATCH REPAIR COMPLEX                                                               |
| GO MISMATCHED DNA BINDING                                                                |
| KEGG MISMATCH REPAIR                                                                     |
| <b>Nucleotide Excision Repair (NER)</b>                                                  |
| GO GLOBAL GENOME NUCLEOTIDE EXCISION REPAIR                                              |
| GO NUCLEOTIDE EXCISION REPAIR                                                            |
| GO NUCLEOTIDE EXCISION REPAIR COMPLEX                                                    |
| GO NUCLEOTIDE EXCISION REPAIR DNA DAMAGE RECOGNITION                                     |
| GO NUCLEOTIDE EXCISION REPAIR DNA DUPLEX UNWINDING                                       |
| GO NUCLEOTIDE EXCISION REPAIR DNA GAP FILLING                                            |
| GO NUCLEOTIDE EXCISION REPAIR DNA INCISION                                               |
| GO NUCLEOTIDE EXCISION REPAIR PREINCISION COMPLEX ASSEMBLY                               |
| GO NUCLEOTIDE EXCISION REPAIR PREINCISION COMPLEX STABILIZATION                          |
| GO TRANSCRIPTION COUPLED NUCLEOTIDE EXCISION REPAIR                                      |
| KEGG NUCLEOTIDE EXCISION REPAIR                                                          |
| NUCLEOTIDE EXCISION REPAIR                                                               |
| <b>Base Excision Repair (BER)</b>                                                        |
| BASE EXCISION REPAIR                                                                     |
| GO BASE EXCISION REPAIR                                                                  |
| KEGG BASE EXCISION REPAIR                                                                |
| REACTOME BASE EXCISION REPAIR                                                            |
| REACTOME NUCLEOTIDE EXCISION REPAIR                                                      |
| <b>Non-Homologous End Joining (NHEJ)</b>                                                 |
| KEGG NON HOMOLOGOUS END JOINING                                                          |

b.

| Genes in Each List |          |           |         |          |          |       |           |
|--------------------|----------|-----------|---------|----------|----------|-------|-----------|
| HR                 | MMR      | NER       |         |          | BER      | NHEJ  |           |
| ATM                | ABL1     | AQR       | NTHL1   | SUMO3    | APEX1    | UNG   | DCLRE1C   |
| BLM                | EXO1     | ATXN3     | OGG1    | TCEA1    | APEX2    | USP47 | DNNT      |
| BRCA1              | LIG1     | BRCA2     | PARP1   | TP53     | CCNO     | WRN   | FEN1      |
| BRCA2              | MLH1     | CCNH      | PCNA    | UBA52    | DNA2     | XPA   | LIG4      |
| BRIP1              | MLH3     | CDK7      | PNKP    | UBB      | ERCC6    | XRCC1 | LOC731751 |
| C12orf48           | MSH2     | CETN2     | POLB    | UBC      | FEN1     |       |           |
| CHEK1              | MSH3     | CHD1L     | POLD1   | UBE2I    | HMGA1    |       | NHEJ1     |
| EME1               | MSH4     | CHRACT1   | POLD2   | UBE2N    | HMGA2    |       | POLL      |
| FIGNL1             | MUTYH    | COPS4     | POLD3   | UBE2V2   | HMGB1P10 |       | RAD50     |
| FIGNL2             | PCNA     | COPS5     | POLD4   | USP45    | HMGB1P40 |       | XRCC4     |
| H2AFX              | PMS1     | COPS6     | POLE    | USP7     | HMGB2    |       | XRCC5     |
| HELLB              | PMS2     | COPS7A    | POLE2   | XAB2     | HUWE1    |       | XRCC6     |
| KDM1A              | PMS2CL   | COPS7B    | POLE3   | XPA      | LIG1     |       |           |
| KIAA0146           | PMS2P1   | COPS8     | POLE4   | XPC      | LIG3     |       |           |
| LIG1               | PMS2P3   | CUL4A     | POLK    | XPCCETN2 | MBDA     |       |           |
| LOC651610          | PMS2P5   | CUL4B     | POLL    | XRCC1    | MPG      |       |           |
| MDC1               | POLD1    | DDB1      | POLR2A  | ZNF830   | MSH2     |       |           |
| MRE11A             | POLD2    | DDB2      | POLR2B  |          | MSH3     |       |           |
| MUS81              | POLD3    | EP300     | POLR2C  |          | MSH6     |       |           |
| NBN                | POLD4    | ERCC1     | POLR2D  |          | MUTYH    |       |           |
| POLD1              | RFC1     | ERCC2     | POLR2E  |          | NEIL1    |       |           |
| POLD2              | RFC2     | ERCC3     | POLR2F  |          | NEIL2    |       |           |
| POLD3              | RFC3     | ERCC4     | POLR2G  |          | NEIL3    |       |           |
| POLD4              | RFC4     | ERCC5     | POLR2H  |          | NTHL1    |       |           |
| POLQ               | RFC5     | ERCC6     | POLR2I  |          | OGG1     |       |           |
| PPP4C              | RNASEH2A | ERCC8     | POLR2J  |          | PARP1    |       |           |
| PPP4R2             | RPA1     | FAN1      | POLR2K  |          | PARP2    |       |           |
| RAD50              | RPA2     | GPS1      | POLR2L  |          | PARP3    |       |           |
| RAD51              | RPA3     | GTF2H1    | PPIE    |          | PARP4    |       |           |
| RAD51AP1           | RPA4     | GTF2H2    | PRPF19  |          | PCNA     |       |           |
| RAD51B             | SETD2    | GTF2H2B   | RAD23A  |          | POLB     |       |           |
| RAD51C             | SSBP1    | GTF2H2C   | RAD23B  |          | POLD1    |       |           |
| RAD51D             | TDG      | GTF2H2D   | RAD51D  |          | POLD2    |       |           |
| RAD52              | TP73     | GTF2H3    | RBBP8   |          | POLD3    |       |           |
| RAD54B             | TREX1    | GTF2H4    | RBX1    |          | POLD4    |       |           |
| RAD54L             | WRN      | GTF2H5    | RFC1    |          | POLE     |       |           |
| RPA1               | XPC      | HMGN1     | RFC2    |          | POLE2    |       |           |
| RPA2               |          | HUS1      | RFC3    |          | POLE3    |       |           |
| RPA3               |          | HUS1B     | RFC4    |          | POLE4    |       |           |
| RPA4               |          | ISY1      | RFC5    |          | POLG     |       |           |
| RTEL1              |          | KIAA1530  | RNF111  |          | POLL     |       |           |
| SHFM1              |          | LIG1      | RPA1    |          | POLQ     |       |           |
| SIRT6              |          | LIG3      | RPA2    |          | PRMT6    |       |           |
| SSBP1              |          | LIG4      | RPA3    |          | RECQL4   |       |           |
| TERF2IP            |          | LOC652672 | RPA4    |          | RPA1     |       |           |
| TEX15              |          | LOC652857 | RPS27A  |          | RPA2     |       |           |
| TOP3A              |          | MMS19     | SIRT1   |          | RPA3     |       |           |
| TOP3B              |          | MNAT1     | SLC30A9 |          | SIRT6    |       |           |
| TP53BP1            |          | NEIL1     | SLX4    |          | SMUG1    |       |           |
| XRCC2              |          | NEIL2     | SUMO1   |          | TDG      |       |           |
| XRCC3              |          | NEIL3     | SUMO2   |          | TP53     |       |           |

c.

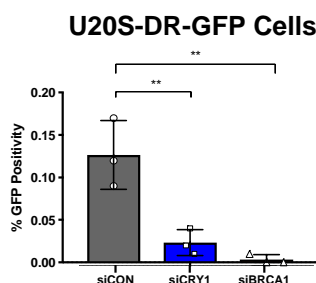

**Supplementary Figure 5. Genome-wide assessment of CRY1 identifies direct regulation of DNA repair processes.** **A.** List of all the MSigDB Gene Sets used for all the different types of DDR – HR, MMR, NER, BER, and NHEJ used in the comparison of RNA-Seq and ChIP-Seq. **B.** List of all the DDR genes regulated by CRY1 in each specific type of DDR pathway. **C.** CRY1 expression was knocked down in U20S-DR-GFP cells for 72 hrs via siRNA or cells were treated siBRCA1 for 24 hrs and then transfected with I-Sce1 to induce double-strand breaks. Cells were harvested for flow cytometry to analyze GFP positive cells. N=3 independent experiments. Data are presented as mean values  $\pm$  SEM and analyzed using one-way Anova (\*\* $p < 0.01$ ). Statistical significance was evaluated at 0.05 alpha level with GraphPadPrism, version 8.3.1, Mac. Source data are provided in the Source Data file.

## Supplementary Figure 6

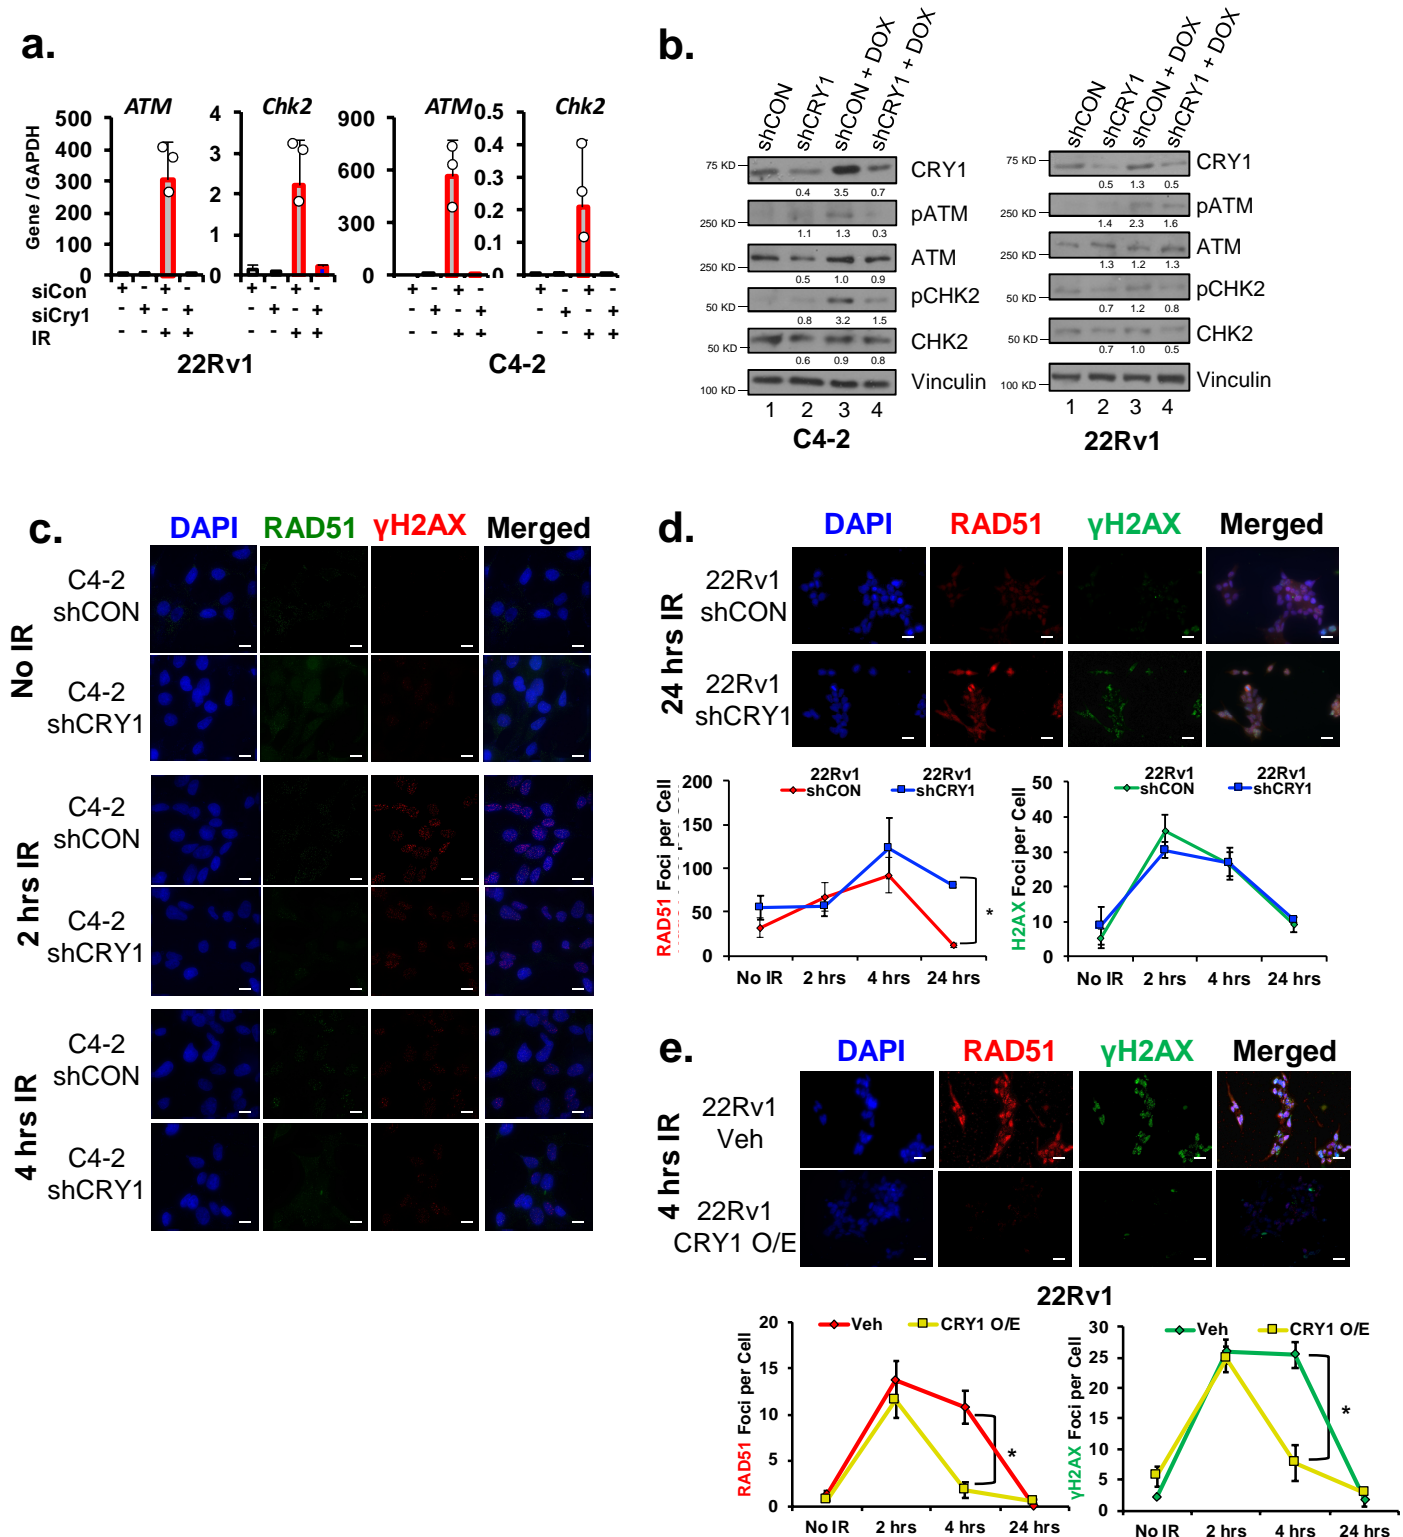

## Supplementary Figure 7

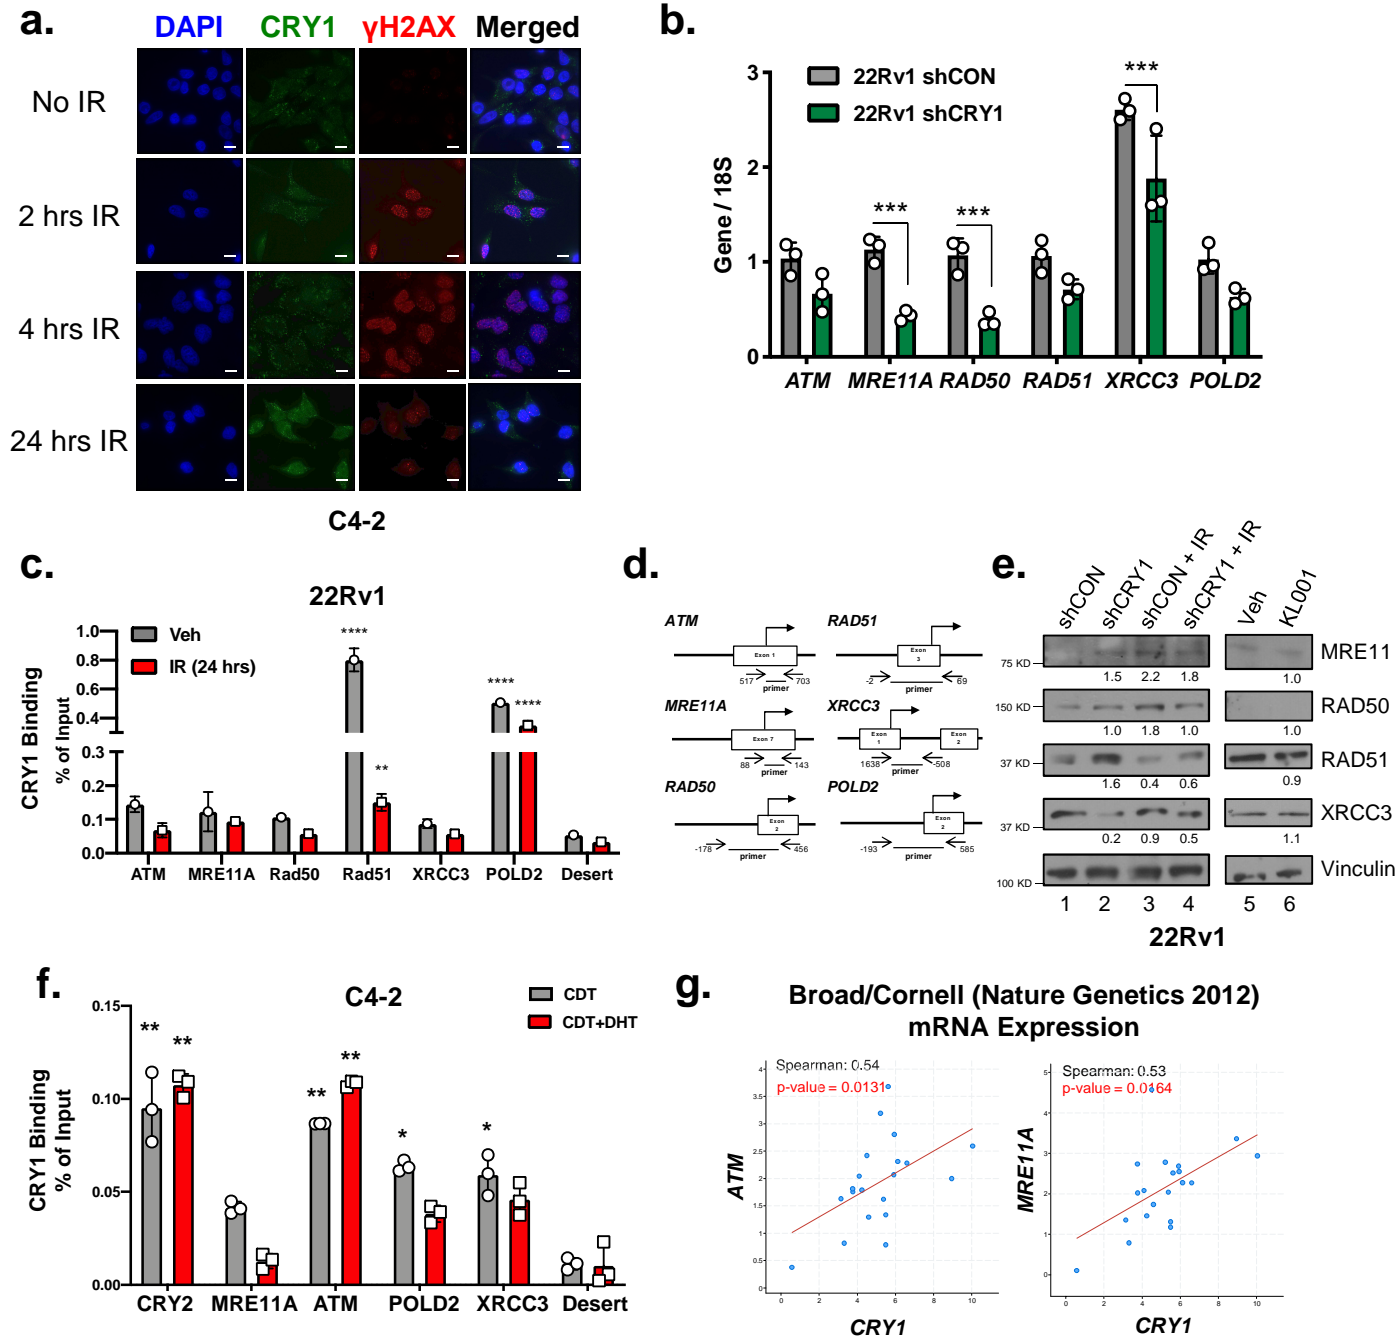

### Supplementary Figure 7. CRY1 directly binds to promoters of HR genes and regulates HR gene expression to promote DNA repair.

**A.** C4-2 cells were treated with 5 Gy IR for 2, 4, and 24 hrs. Cells were fixed at the indicated time points, stained with  $\gamma$ -H2AX and CRY1 antibodies, and imaged by confocal microscopy. Scale bar 250  $\mu$ m. **B.** CRY1 expression was knocked down in 22Rv1-shCRY1 cells for 72 hrs. Cells were harvested for RNA. *ATM*, *Mre11A*, *Rad50*, *Rad51*, *XRCC3*, *POLD2*, and *18S* mRNA. **C.** CRY1 ChIP qPCR was performed on the promoter of *ATM*, *Rad51*, *Mre11A*, *Rad50*, *XRCC3*, *POLD2*, and a desert region to determine the binding of CRY1 after 24 hrs of 5 Gy IR treatment in 22Rv1 cells and in vehicle condition in 22Rv1 cells. Binding is plotted as percent input. **D.** Schematic of primers designed for each CRY1 ChIP site on the HR genes. Numbers indicate nucleotides from start of exon. **E.** CRY1 expression was knocked down in 22Rv1-shCRY1 cells for 72 hrs and then cells were treated with 5 Gy IR for 24 hrs. 22Rv1 cells were treated with 10  $\mu$ M KL001 (CRY1 activator) for 24 hrs. Cells were harvested for protein. *MRE11A*, *RAD50*, *RAD51*, *XRCC3*, and vinculin were analyzed. **F.** CRY1 ChIP qPCR was performed on *CRY2*, *Mre11A*, *ATM*, *XRCC3*, *POLD2*, and a desert region to determine the binding of CRY1 in CDT and CDT+DHT (10 nM, 2 hours) treatment in C4-2 cells. Binding is plotted as percent input. **G.** Co-expression of CRY1 and either *ATM*, *MRE11A*, and *RAD50* mRNA in PCA tissue from publicly available data from Broad/Cornell (Nature Genetics 2012). N=3 independent experiments. Data are presented as mean values  $\pm$  SEM and analyzed using one-way Anova (\* $p < 0.05$ , \*\* $p < 0.01$ , \*\*\* $p < 0.001$ , &, \*\*\*\* $p < 0.0001$ ). Statistical significance was evaluated at 0.05 alpha level with GraphPadPrism, version 8.3.1, Mac. Source data are provided in the Source Data file.

**ChIP qPCR Primer Sequences**

| <b>Target</b> | <b>Sequence (5' to 3')</b> |                        |
|---------------|----------------------------|------------------------|
|               | <b>Forward</b>             | <b>Reverse</b>         |
| CCND3         | ACGGAGGCTCAGGTGTGG         | GGATAGCACGTGGAGGAGTT   |
| CCNE1         | AATGCACAGGGGCTCTTAGG       | GAGCACCTACGTACAGCCAG   |
| CDK2          | GGAGTTGTGTACAAAGCCAGAA     | ACGTGTCCAGGCGGATTTT    |
| CDK4          | TGTGACCAGCTGCCAAAGAG       | AGAGCAATGTCAAGCGGTCA   |
| CUL4A         | AGAGCAATGTCAAGCGGTCA       | TCACCTGGTAGAGCTCCTCG   |
| E2F3          | CACTTCCTCCTGCTCGCC         | GAGGAGAGGGAGGGTGCC     |
| MCM7          | GCCATCGCTTCCGCTCTTA        | CGGTGTCTCTGGGTGTGATG   |
| POLD2         | GAGCTTTTGGCTCGAACGTG       | TGAGTGGGGTCCAGGGAAAC   |
| POLE4         | CTAGGCGCGTGGGAAGAG         | CCACACCCTGTGTAGGCG     |
| ATM           | AAAACCACAGCAGGAACCAC       | TCCAAGTCTGAGGACGGAAG   |
| MRE11A        | CTTGTACGACTGCGAGTGGA       | TTCACCCATCCCTCTTTCTG   |
| RAD50         | CTTTGGGATCATTGCCCTGTG      | CGAAGTGGTGGTCTTGTTGCT  |
| RAD51         | CACTCTGTCGCCCAGGC          | TCATCTTGGGCCAGGTG      |
| XRCC3         | ATCTGCACGGAGGGATGGTT       | GCCAACCGGTGAGTCTGTTATC |
| Desert        | CTAGGAGGGTGGAGGTAGGG       | GCCCCAACAGGAGTAATGA    |

**Supplementary Table 2****qPCR Primer Sequences**

| <b>Target</b> | <b>Sequence (5' to 3')</b>   |                             |
|---------------|------------------------------|-----------------------------|
|               | <b>Forward</b>               | <b>Reverse</b>              |
| CRY1          | CAACCTCCATTCATCTTTCC         | CTCATAGCCGACACCTTC          |
| p21           | GGCAGACCAGCATGACAGATT        | GCGGATTAGGGCTTCCTCT         |
| FAS           | GGGCATCTGGACCCTCCTAC         | GATAATCTAGCAACAGACGTAAGAACA |
| CCND3         | CTCATCAAGAGCTATCTGTTCC       | TTTAAGGTCTCGGTGGAGG         |
| CCNE1         | TTATGAAGCTGTTGGATCTCTG       | AATGATACAAGGCCGAAGC         |
| CDK2          | CTCATCAAGAGCTATCTGTTCC       | TTTAAGGTCTCGGTGGAGG         |
| CDK4          | TGTAGACCAGGACCTAAGGA         | CGCATCAGATCCTTGATCG         |
| CUL4A         | CACAGATCCTTCCGTTTAGAG        | GATCATGATCATTGTCTGCAG       |
| BRCA1         | TTTGGAGTATGCAAACAGCT         | TCTGTAGCCCATACTTTGGA        |
| BRCA2         | CAAAGTTTGTGAAGGGTCGT         | ACCAAGACATATCAGGATCCA       |
| GTF2H1        | CTGTCTAGAGTTGTAGCTTCC        | TCTTCAGATGAGGTTGCCA         |
| MCM7          | AGTATGGGAACCAAGTTGGT         | ATTTACCACTTCCCTCTCCT        |
| POLD2         | AATGAGACCCTTCCCTGGAG         | CTTCACTCCCCTCCACTG          |
| POLD4         | GTTGTGAAGAGGAGGGAGG          | TAGAGATGCCAGAGACGGT         |
| POLE4         | CTGTTTGTGGAGACCATTGC         | GGCAATCAATCTAAAGTACCTTCC    |
| PTTG1         | TGGACCTTCAATCAAAGCC          | TTTAGGTAAGGCTGGTGGG         |
| RFC3          | GAGATAATAATGAAGGGCCTTC<br>TC | TAGTAAGCTGCCATTTGTGC        |
| TEX15         | GAATACTCGTGAAGTCAATCCT       | ACGTGCATCTATTCTTTCTCAG      |
| ATM           | GCGTTGCTTCTTCCCTCCAGA        | ATCACTGTCACTGCACTCGG        |
| MRE11A        | AGAAGATAGACATTAGTCCGGT       | CATCTGGAATGGATCCTAAACC      |
| RAD50         | GAGATGGAGCAGTTAAACCA         | GTTTCATCTTTGTCAGCTTTGTC     |
| RAD51         | TCACGGTTAGAGCAGTGTG          | AACAGCCTCCACAGTATGG         |
| RAD54B        | TGCCATTAAGACAACACTACAGC      | TCATTCTGAATTGGAGTACCAG      |
| XRCC3         | CATCCTTACAGCACTGCAG          | TTCCGTGCAGATGTAGACG         |
